# Supplementary material for: LVAD as a Bridge to Remission from Advanced Heart Failure: Current Data and Opportunities for Improvement
Source: MDPI journal article supplement (doi:10.3390/jcm11123542), 2022-06-20
Supplement: s1 [file s1]

**Supplemental Table S1.** Clinical value of echocardiography and RHC for pre-explant prediction of long-term freedom from HF recurrence in case of LVAD explantation. (*Table reproduced from Dandel M, et al. Evaluation of Cardiac Recovery in Ventricular Assist Device Recipients: Particularities, Reliability, and Practical Challenges. Can J Cardiol. 2019 Apr;35(4):523-534*) (42)

| Examination                                                        | Parameters and parameter-derived measurements during pre-explant off-pump trials (at rest, without inotropic myocardial support)                                                                                                                                                                                                                                                                                                                                                                                                                                                                                                                                                                                                                                                                                                                                                                                                                                                                | Predictive value for ≥ 5 years postweaning cardiac stability                                                                                                                                                                                                                     |
|--------------------------------------------------------------------|-------------------------------------------------------------------------------------------------------------------------------------------------------------------------------------------------------------------------------------------------------------------------------------------------------------------------------------------------------------------------------------------------------------------------------------------------------------------------------------------------------------------------------------------------------------------------------------------------------------------------------------------------------------------------------------------------------------------------------------------------------------------------------------------------------------------------------------------------------------------------------------------------------------------------------------------------------------------------------------------------|----------------------------------------------------------------------------------------------------------------------------------------------------------------------------------------------------------------------------------------------------------------------------------|
| TTE in patients with off-pump RHC measurements in the normal range | <p>LVEF ≥ 45% during the last pre-explant TTE off-pump* trial</p> <p>LVEF ≥ 45% plus normal LVEDD (≤ 55 mm at BSA ≤ 1.8 m<sup>2</sup>) during the last pre-explant TTE off-pump* trial</p> <p>LVEF ≥ 45% plus RWTLV ≥ 0.38</p> <p>Stable pre-explant LVEF ≥ 45% after maximal LV improvement and during the last pre-explant TTE off-pump* trial</p> <p>LVEF ≥ 45% plus Sm ≥ 8cm/s, stable after maximum improvement and during the last pre-explant TTE off-pump* trial</p> <p>Stable pre-explant LVEF ≥ 45% plus stable normal LVEDD after maximal LV improvement and during the last pre-explant TTE off-pump* trial</p> <p>Stable VTI in the LVOT (PW-Doppler) during the last pre-explant TTE off-pump* trial (ie, stable LV stroke volume)</p> <p>No or only mild MR and/or AR</p> <p>No RV dilation (end-diastolic RVOT diameter &lt; 35 mm, RV short/long axis-ratio in the apical 4C view &lt; 0.6)</p> <p>No or less than grade II tricuspid and/or pulmonary valve regurgitation</p> | <p>74%†</p> <p>86%†</p> <p>87%†</p> <p>86%†</p> <p>87%†</p> <p>94%†</p> <p>Alone not predictive for long-term post-explant freedom from HF recurrence, but all these Doppler-derived measurements, plus the exclusion of RV dilation, are a precondition for weaning success</p> |
| RHC‡                                                               | <p>CI &gt; 2.6L/min/m<sup>2</sup> BSA, without continuous reduction up to the end of the final pre-explant off-pump trial</p> <p>PCWP &lt; 13 mm Hg, without continuous increase up to the end of the final pre-explant off-pump trial</p> <p>Right atrial pressure (mean) &lt; 10 mm Hg without continuous increase up to the end of the final off-pump trial</p>                                                                                                                                                                                                                                                                                                                                                                                                                                                                                                                                                                                                                              | RHC data are alone not predictive for long-term post-explant freedom from HF recurrence, but are a precondition for successful weaning                                                                                                                                           |

BSA: body surface area; CI: cardiac index; 4C: 4 chamber; HF: heart failure; LV: left ventricle; LVAD: left ventricular assist device; MR and AR: mitral regurgitation and aortic regurgitation, respectively; LVEF: left ventricle ejection fraction; LVEDD: left ventricular end-diastolic diameter; LVOT: LV outflow tract; PCWP: pulmonary capillary wedge pressure; PW: pulsed wave; RWTLV: left ventricular relative wall thickness ([posterior wall thickness + ventricular septum thickness]/LVEDD); RHC: right heart catheterization; TTE: transthoracic echocardiography; VTI: velocity-time integral.

\* Off-pump measurements imply either temporary pump stops (true off-pump trial) or temporary pump turn-down to values resulting in ± zero flow in 1 cardiac cycle, depending on whether the LVAD is a pulsatile- or a continuous-flow pump.

† Predictive value of the TTE parameter for ≥ 5years freedom from HF recurrence is valid only for patients with normal RHC-derived off-pump hemodynamic measurements before explantation.

‡ Measurements obtained during repeated pump stops with balloon occlusion of the outflow graft in CF LVAD recipients.

**Supplemental Table S2.** Clinical value of echocardiography for pre-explant risk assessment for HF recurrence after LVAD explantation. *(Table reproduced from Dandel M, et al. Evaluation of Cardiac Recovery in Ventricular Assist Device Recipients: Particularities, Reliability, and Practical Challenges. Can J Cardiol. 2019 Apr;35(4):523-534) (42)*

| ECHO approach                                                                                                                                                                                                                                                                                                                                                                                                                                                                                                                                                                                                                                                                                                                                                            | Parameters and parameter-derived measurements during pre-explant off-pump trials in LVAD recipients with no worse than borderline RHC-derived off-pump hemodynamic measurements                                                                                                                                                                                                                                                                                                                                                                                                                                                                                                                                                                                                                                                                                                                                                                                                                                                                                                                  | Predictive value for HF recurrence after ≤ 3 years                                                        |
|--------------------------------------------------------------------------------------------------------------------------------------------------------------------------------------------------------------------------------------------------------------------------------------------------------------------------------------------------------------------------------------------------------------------------------------------------------------------------------------------------------------------------------------------------------------------------------------------------------------------------------------------------------------------------------------------------------------------------------------------------------------------------|--------------------------------------------------------------------------------------------------------------------------------------------------------------------------------------------------------------------------------------------------------------------------------------------------------------------------------------------------------------------------------------------------------------------------------------------------------------------------------------------------------------------------------------------------------------------------------------------------------------------------------------------------------------------------------------------------------------------------------------------------------------------------------------------------------------------------------------------------------------------------------------------------------------------------------------------------------------------------------------------------------------------------------------------------------------------------------------------------|-----------------------------------------------------------------------------------------------------------|
| Standard TTE at rest during interruption of LVAD support                                                                                                                                                                                                                                                                                                                                                                                                                                                                                                                                                                                                                                                                                                                 | LVEF < 45% during the last pre-explant off-pump trial<br>LVEF < 45% during the last pre-explant off-pump trial plus pre-implant HF duration of > 5 years<br>Unstable LVEF ≥ 45% with pre-explant alteration of > 10% of best value<br>LVEF ≥ 45% without normalization of LV size (insufficient reverse remodelling with LVEDD > 55 mm at BSA ≤ 1.8 cm <sup>2</sup> )<br>LVEF ≥ 45% with insufficient reverse remodelling (RWTLV < 0.38)<br>LVEF ≥ 45% with unstable reverse remodelling (RWTLV reduction of > 8% during the last pre-explant off-pump trial)<br>LVEF ≥ 45% with unstable LV geometry (S/LED increase of > 10% during the last pre-explant off-pump trial)<br>LVEF ≥ 45% in the presence of low systemic APd (≤ 50 mm Hg)<br>Transmitral restrictive flow-profile (accentuation or new appearance)<br>VTI reduction in the LVOT (= stroke volume reduction) during the final off-pump trials<br>TR (new appearance or accentuation) and/or TR jet velocity increase during the final off-pump trials<br>RVEDD increase ± RV geometry alterations during the final off-pump trial | 88%<br>≈ 100%<br>90%<br>89%<br>82%<br>87%<br>85%<br>Proven risk factors no data on their predictive value |
| TDI & 2D-STE at rest during interruption of LVAD support                                                                                                                                                                                                                                                                                                                                                                                                                                                                                                                                                                                                                                                                                                                 | LVEF ≥ 45% with low wall-motion velocity (Sm < 8 cm/s)<br>LVEF ≥ 45% with unstable wall-motion velocity (Sm alteration of > 10% during the final off-pump trials)<br>LV myocardial asynchrony and dyssynergy during the final off-pump trials                                                                                                                                                                                                                                                                                                                                                                                                                                                                                                                                                                                                                                                                                                                                                                                                                                                    | 83%<br>90%<br>Risk factor; no data on predictive value                                                    |
| Off-pump DSE                                                                                                                                                                                                                                                                                                                                                                                                                                                                                                                                                                                                                                                                                                                                                             | Minor LVEF increase during DSE (absolute increase in LVEF by < 5%)                                                                                                                                                                                                                                                                                                                                                                                                                                                                                                                                                                                                                                                                                                                                                                                                                                                                                                                                                                                                                               | Risk factor; no data on predictive value                                                                  |
| TTE after 6 MW                                                                                                                                                                                                                                                                                                                                                                                                                                                                                                                                                                                                                                                                                                                                                           | LVEF < 50% after 6MW                                                                                                                                                                                                                                                                                                                                                                                                                                                                                                                                                                                                                                                                                                                                                                                                                                                                                                                                                                                                                                                                             | Risk factor; no data on predictive value                                                                  |
| APd: diastolic arterial pressure; BSA: body surface area; DSE: dobutamine stress echocardiography; ECHO: echocardiography; HF: heart failure; LV: left ventricle; LVAD: left ventricular assist device; LVEF: left ventricular ejection fraction; LVOT: left ventricular outflow tract; RHC: right heart catheterization; RV: right ventricle; RVEDD: RV end-diastolic diameter; RWTLV: LV end-diastolic relative wall thickness; S/LED: LV end-diastolic short/long axis ratio; 6MW: 6-minute walk; Sm: systolic wall motion peak velocity at the basal LV posterior wall; TR: tricuspid regurgitation; TDI: tissue Doppler imaging; TTE: transthoracic echocardiography; 2D-STE: 2-dimensional speckle tracking-derived echocardiography; VTI: velocity-time integral. |                                                                                                                                                                                                                                                                                                                                                                                                                                                                                                                                                                                                                                                                                                                                                                                                                                                                                                                                                                                                                                                                                                  |                                                                                                           |
